# Supplementary material for: Identification of a Major QTL-Controlling Resistance to the Subtropical Race 4 of Fusarium oxysporum f. sp. cubense in Musa acuminata ssp. malaccensis
Source: MDPI journal article supplement (doi:10.3390/pathogens12020289), 2023-02-09
Supplement: s1 [file s1]

# Identification of a major QTL controlling resistance to the Subtropical Race 4 of *Fusarium oxysporum* f. sp. *cubense* in *Musa acuminata* ssp. *malaccensis*.

## Supplementary Data

Figure S1.

Table S1.

Table S2.

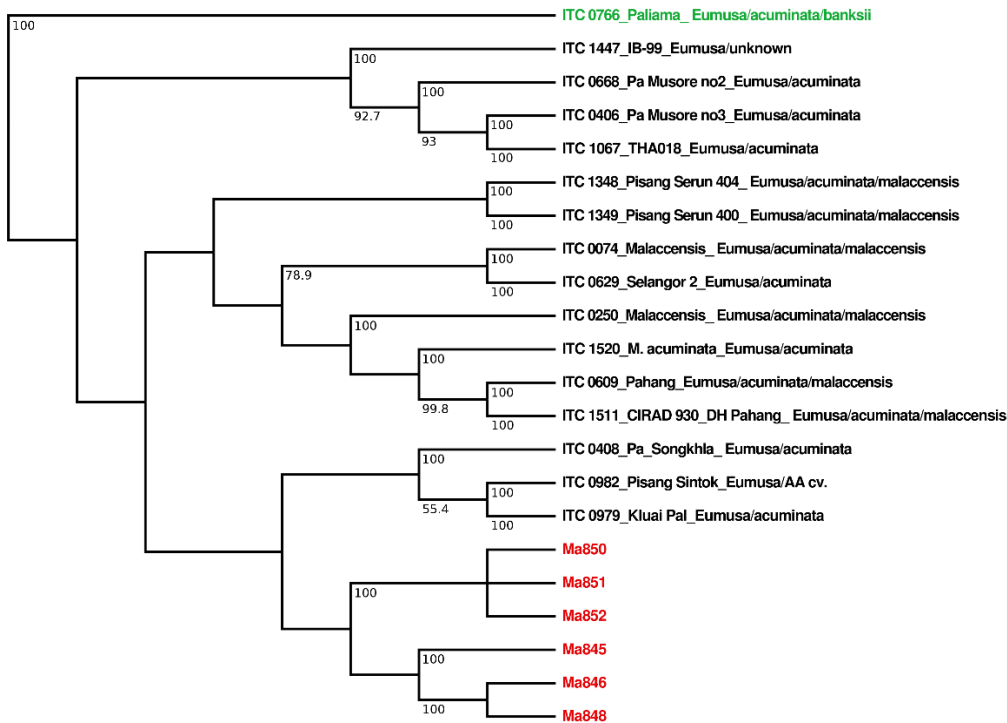

**Figure S1.** UPGMA analysis of ‘Ma845’, ‘Ma846’, ‘Ma848’, ‘Ma850’, ‘Ma851’, ‘Ma852’ using SSR genotyping and *M. acuminata*, ssp. *malaccensis* accessions from the *Musa* core collection. Bootstrap support values higher than 50% are marked below the corresponding branches. The accessions used in this study are highlighted in red. The *M. a.* ssp. *banksii* used as an outgroup to anchor the whole group is highlighted in green.

**Table S1.** Annotated effects in Sequence Ontology (SO) terms associated with the variants detected in the ‘SnEff’ analysis. The SO numbers are listed next to the terms. The up- and down- stream regions define a 5 Kb sequence extending from the respective 3’ and 5’ UTRs. The splice\_region\_variant corresponds to a region within 1-3 bp of the exon and 3-8 bp of the intron. The transcript\_variant is associated with non-coding transcript variants. The gene\_variant is associated with gene fusion variants. Count and percent show the total number of effects and a percentage associated with these terms, respectively.

| Effect Seq. Ontology (SO)         | Count     | Percent |
|-----------------------------------|-----------|---------|
| intergenic_region (0000605)       | 2,083,710 | 29.37   |
| upstream_gene_variant (0001631)   | 1,805,574 | 25.45   |
| downstream_gene_variant (0001632) | 1,797,363 | 25.33   |
| intron_variant (0001627)          | 1,004,165 | 14.15   |
| exon_variant (0001791)            | 263,738   | 3.72    |
| 3_prime_UTR_variant (0001624)     | 65,819    | 0.93    |
| 5_prime_UTR_variant (0001623)     | 53,746    | 0.76    |
| splice_region_variant (0001630)   | 20,030    | 0.28    |
| splice_donor_variant (0001575)    | 642       | 0.01    |
| splice_acceptor_variant (0001574) | 506       | 0.01    |
| transcript_variant (0001576)      | 407       | 0.01    |
| gene_variant (0001564)            | 10        | 0       |

**Table S2.** A list of putatively defined candidate genes with potential roles in *Foc* STR4 resistance. The genes are retrieved from the DH-Pahang v4.3 assembly. RLK: receptor-like Kinase; RLP: receptor-like protein; NBS: nucleotide binding site; NBS-LRR: nucleotide binding site and leucine-rich repeat; STK: serine/threonine kinase; ERL2: ERECTA-like 2; GSO1: GASSHO1; CEPR2: C-terminally encoded peptide receptor 2; TMK1: transmembrane kinase 1; EIX2: ethylene-inducing xylanase 2; CC: coiled-coil; NB-ARC: nucleotide-binding adaptor shared by APAF-1, R proteins and CED-4; RPP13: recognition of *Peronospora parasitica* (a.k.a *Hyaloperonospora arabidopsidis*) 13; RGA: resistance gene analog; BTB/POZ: broad complex, tramtrack and bric-à-brac/poxirus and zinc finger; AC: adenyl cyclase; ANK: ankyrin repeats; NPR1: Nonexpressor of pathogenesis-related genes 1. An asterisk (\*) next to the gene name denotes the presence of exon SNP variants detected from 'ANNOVAR'. The ^ symbol denotes gene accessions associated with the enriched GO:0043531 (ADP binding) in the GO category of Molecular Function.

| Gene Name           | Description                                                     | Category |
|---------------------|-----------------------------------------------------------------|----------|
| Macma4_03_g25720.1  | Calcium/calmodulin-regulated receptor-like kinase 1             | RLK      |
| Macma4_03_g29370.1  | Cysteine-rich receptor-like protein kinase 2                    | RLK      |
| Macma4_03_g31620.1  | Cysteine-rich receptor-like protein kinase 6                    | RLK      |
| Macma4_03_g31330.1  | Cysteine-rich receptor-like protein kinase 6                    | RLK      |
| Macma4_03_g31510.1  | Cysteine-rich receptor-like protein kinase 6                    | RLK      |
| Macma4_03_g31480.1  | Cysteine-rich receptor-like protein kinase 6                    | RLK      |
| Macma4_03_g31540.1* | Cysteine-rich receptor-like protein kinase 6                    | RLK      |
| Macma4_03_g25670.1  | G-type lectin S-receptor-like serine/threonine kinase At1g11330 | RLK      |
| Macma4_03_g32260.1* | Leaf rust 10 resistance locus receptor-like kinase-like 1.2     | RLK      |
| Macma4_03_g32230.1* | Leaf rust 10 resistance locus receptor-like kinase-like 1.2     | RLK      |
| Macma4_03_g32280.1  | Leaf rust 10 resistance locus receptor-like kinase-like 1.2     | RLK      |
| Macma4_03_g32270.1* | Leaf rust 10 resistance locus receptor-like kinase-like 1.3     | RLK      |
| Macma4_03_g32220.1  | Leaf rust 10 resistance locus receptor-like kinase-like 2.1     | RLK      |
| Macma4_03_g32240.1  | Leaf rust 10 resistance locus receptor-like kinase-like 2.1     | RLK      |
| Macma4_03_g26300.1* | Leaf rust 10 resistance locus receptor-like kinase-like 2.3     | RLK      |
| Macma4_03_g26540.1  | LRR receptor-like serine/threonine-protein kinase ERL2          | RLK      |
| Macma4_03_g31350.1* | LRR receptor-like serine/threonine-protein kinase GSO1          | RLK      |
| Macma4_03_g31320.1* | LRR receptor-like serine/threonine-protein kinase GSO1          | RLK      |
| Macma4_03_g29270.1  | Receptor-like serine/threonine-protein kinase At3g01300         | RLK      |
| Macma4_03_g24460.1  | Receptor protein-tyrosine kinase CEPR2                          | RLK      |
| Macma4_03_g25180.1  | Receptor protein kinase TMK1                                    | RLK      |
| Macma4_03_g28830.1  | Protein kinase domain-containing protein                        | RLK      |
| Macma4_03_g29810.1* | Protein kinase domain-containing protein                        | RLK      |
| Macma4_03_g30040.1  | Protein kinase domain-containing protein                        | RLK      |
| Macma4_03_g30400.1  | Protein kinase domain-containing protein                        | RLK      |
| Macma4_03_g30950.1  | Protein kinase domain-containing protein                        | RLK      |

|                      |                                                           |         |
|----------------------|-----------------------------------------------------------|---------|
| Macma4_03_g31060.1   | Protein kinase domain-containing protein                  | RLK     |
| Macma4_03_g31640.1*  | Receptor-like protein EIX2                                | RLP     |
| Macma4_03_g31660.1*  | Receptor-like protein EIX2                                | RLP     |
| Macma4_03_g31580.1   | Receptor-like protein EIX2                                | RLP     |
| Macma4_03_g31530.1   | Receptor-like protein EIX2                                | RLP     |
| Macma4_03_g31410.1   | Receptor-like protein EIX2                                | RLP     |
| Macma4_03_g31450.1   | Receptor-like protein EIX2                                | RLP     |
| Macma4_03_g31520.1*  | Receptor-like protein EIX2                                | RLP     |
| Macma4_03_g31610.1   | Receptor-like protein EIX2                                | RLP     |
| Macma4_03_g31460.1*  | Receptor-like protein EIX2                                | RLP     |
| Macma4_03_g31630.1*  | Receptor-like protein EIX2                                | RLP     |
| Macma4_03_g32400.1   | Receptor-like protein EIX2                                | RLP     |
| Macma4_03_g31550.1*  | Receptor-like protein EIX2                                | RLP     |
| Macma4_03_g31370.1   | Receptor-like protein EIX2                                | RLP     |
| Macma4_03_g31470.1   | Receptor-like protein EIX2                                | RLP     |
| Macma4_03_g31590.1   | Receptor-like protein EIX2                                | RLP     |
| Macma4_03_g31570.1*  | Receptor-like protein EIX2                                | RLP     |
| Macma4_03_g31500.1   | Receptor-like protein EIX2                                | RLP     |
| Macma4_03_g30450.1^  | Disease resistance protein (CC-NBS-LRR)                   | NBS-LRR |
| Macma4_03_g30580.1*^ | Disease resistance protein (CC-NBS-LRR)                   | NBS-LRR |
| Macma4_03_g30500.1*^ | Disease resistance protein (CC-NBS-LRR)                   | NBS-LRR |
| Macma4_03_g30560.1*^ | Disease resistance protein (CC-NBS-LRR)                   | NBS-LRR |
| Macma4_03_g30530.1*^ | Disease resistance protein (CC-NBS-LRR)                   | NBS-LRR |
| Macma4_03_g30590.1^  | Disease resistance protein (CC-NBS-LRR)                   | NBS-LRR |
| Macma4_03_g30490.1*^ | Disease resistance protein (CC-NBS-LRR)                   | NBS-LRR |
| Macma4_03_g30510.1*^ | Disease resistance protein (CC-NBS-LRR)                   | NBS-LRR |
| Macma4_03_g30840.1*^ | Disease resistance protein (CC-NBS-LRR)                   | NBS-LRR |
| Macma4_03_g30470.1*^ | NB-ARC domain-containing protein                          | NBS     |
| Macma4_03_g30480.1^  | NB-ARC domain-containing protein                          | NBS     |
| Macma4_03_g24770.1*^ | Disease resistance RPP13-like protein 1                   | NBS-LRR |
| Macma4_03_g24780.1^  | Disease resistance RPP13-like protein 1                   | NBS-LRR |
| Macma4_03_g24800.1^  | Disease resistance RPP13-like protein 1                   | NBS-LRR |
| Macma4_03_g24810.1*^ | Disease resistance RPP13-like protein 1                   | NBS-LRR |
| Macma4_03_g24820.1*^ | Disease resistance RPP13-like protein 1                   | NBS-LRR |
| Macma4_03_g24830.1*^ | Disease resistance RPP13-like protein 1                   | NBS-LRR |
| Macma4_03_g24850.1*^ | Disease resistance RPP13-like protein 1                   | NBS-LRR |
| Macma4_03_g24860.1^  | Disease resistance RPP13-like protein 1                   | NBS-LRR |
| Macma4_03_g24880.1*^ | Disease resistance RPP13-like protein 1                   | NBS-LRR |
| Macma4_03_g24890.1^  | Disease resistance RPP13-like protein 1                   | NBS-LRR |
| Macma4_03_g24910.1^  | Disease resistance RPP13-like protein 1                   | NBS-LRR |
| Macma4_03_g24930.1^  | Disease resistance RPP13-like protein 1                   | NBS-LRR |
| Macma4_03_g30600.1^  | Disease resistance RPP13-like protein 1                   | NBS-LRR |
| Macma4_03_g24870.1^  | Disease resistance protein RGA1                           | NBS-LRR |
| Macma4_03_g24920.1*^ | Disease resistance protein RGA1                           | NBS-LRR |
| Macma4_03_g30570.1^  | Disease resistance protein RGA1                           | NBS-LRR |
| Macma4_03_g30440.1*^ | Disease resistance protein RGA2                           | NBS-LRR |
| Macma4_03_g30460.1*^ | Disease resistance protein RGA3                           | NBS-LRR |
| Macma4_03_g27700.1^  | Disease resistance protein RGA4                           | NBS-LRR |
| Macma4_03_g30540.1^  | NBS-type disease resistance protein                       | NBS     |
| Macma4_03_g30550.1^  | conserved hypothetical protein                            | NBS     |
| Macma4_03_g24790.1^  | Putative disease resistance protein At3g14460             | AC      |
| Macma4_03_g28590.1*  | BTB/POZ domain and ankyrin repeat-containing protein NPR1 | ANK     |
